# Supplementary material for: Tracking changes between preprint posting and journal publication during a pandemic
Source: PubMed Central journal article supplement (PMC8806067; doi:10.1371/journal.pbio.3001285), 2022-02-01
Supplement: pbio.3001285.s010.pdf [file pbio.3001285.s010.pdf]

# Preprint-->paper evaluation form

\* Required

1. Who are you? \*

*Mark only one oval.*

JC

MP

GD

JP

2. Which dataset? \*

*Mark only one oval.*

COVID

Control

3. Manuscript number (according to sheet) \*

---

4. Re-enter manuscript number (according to sheet) \*

---

5. Has the author list changed?

*Check all that apply.*

No

Yes, authors added

Yes, authors removed

Yes, change in corresponding/co-corresponding authors

## 6. Has the abstract changed?

*Mark only one oval.*

- No change or minor: change in wording, if any, does not change main conclusion(s)
- Yes, significant: altered wording or numbers leading to a softening/strengthening of main conclusions(s)
- Yes, major: a discrete change in the main conclusion(s)
- Yes, massive: main conclusion(s) of the paper reversed

## 7. How many figures/panels in the preprint (not supplement)?

*Check all that apply.*

|                                        | 1 panel                  | 2 panels                 | 3 panels                 | 4 panels                 | 5 panels                 | 6 panels                 | 7 panels                 | 8 panels                 | 9 panels                 |
|----------------------------------------|--------------------------|--------------------------|--------------------------|--------------------------|--------------------------|--------------------------|--------------------------|--------------------------|--------------------------|
| Figure 1                               | <input type="checkbox"/> | <input type="checkbox"/> | <input type="checkbox"/> | <input type="checkbox"/> | <input type="checkbox"/> | <input type="checkbox"/> | <input type="checkbox"/> | <input type="checkbox"/> | <input type="checkbox"/> |
| Figure 2                               | <input type="checkbox"/> | <input type="checkbox"/> | <input type="checkbox"/> | <input type="checkbox"/> | <input type="checkbox"/> | <input type="checkbox"/> | <input type="checkbox"/> | <input type="checkbox"/> | <input type="checkbox"/> |
| Figure 3                               | <input type="checkbox"/> | <input type="checkbox"/> | <input type="checkbox"/> | <input type="checkbox"/> | <input type="checkbox"/> | <input type="checkbox"/> | <input type="checkbox"/> | <input type="checkbox"/> | <input type="checkbox"/> |
| Figure 4                               | <input type="checkbox"/> | <input type="checkbox"/> | <input type="checkbox"/> | <input type="checkbox"/> | <input type="checkbox"/> | <input type="checkbox"/> | <input type="checkbox"/> | <input type="checkbox"/> | <input type="checkbox"/> |
| Figure 5                               | <input type="checkbox"/> | <input type="checkbox"/> | <input type="checkbox"/> | <input type="checkbox"/> | <input type="checkbox"/> | <input type="checkbox"/> | <input type="checkbox"/> | <input type="checkbox"/> | <input type="checkbox"/> |
| Figure 6                               | <input type="checkbox"/> | <input type="checkbox"/> | <input type="checkbox"/> | <input type="checkbox"/> | <input type="checkbox"/> | <input type="checkbox"/> | <input type="checkbox"/> | <input type="checkbox"/> | <input type="checkbox"/> |
| Figure 7                               | <input type="checkbox"/> | <input type="checkbox"/> | <input type="checkbox"/> | <input type="checkbox"/> | <input type="checkbox"/> | <input type="checkbox"/> | <input type="checkbox"/> | <input type="checkbox"/> | <input type="checkbox"/> |
| Figure 8                               | <input type="checkbox"/> | <input type="checkbox"/> | <input type="checkbox"/> | <input type="checkbox"/> | <input type="checkbox"/> | <input type="checkbox"/> | <input type="checkbox"/> | <input type="checkbox"/> | <input type="checkbox"/> |
| Figure 9                               | <input type="checkbox"/> | <input type="checkbox"/> | <input type="checkbox"/> | <input type="checkbox"/> | <input type="checkbox"/> | <input type="checkbox"/> | <input type="checkbox"/> | <input type="checkbox"/> | <input type="checkbox"/> |
| Figure 10 or more (combine additional) | <input type="checkbox"/> | <input type="checkbox"/> | <input type="checkbox"/> | <input type="checkbox"/> | <input type="checkbox"/> | <input type="checkbox"/> | <input type="checkbox"/> | <input type="checkbox"/> | <input type="checkbox"/> |

8. How many tables in the preprint (not supplement)?

Mark only one oval.

|                       |                       |                       |                       |                       |                       |                  |
|-----------------------|-----------------------|-----------------------|-----------------------|-----------------------|-----------------------|------------------|
| 0                     | 1                     | 2                     | 3                     | 4                     | 5                     | Choose 5 for >=5 |
| <input type="radio"/> | <input type="radio"/> | <input type="radio"/> | <input type="radio"/> | <input type="radio"/> | <input type="radio"/> |                  |

9. How many figures/panels in the main paper (not supplement)?

Check all that apply.

|                                        | 1 panel                  | 2 panels                 | 3 panels                 | 4 panels                 | 5 panels                 | 6 panels                 | 7 panels                 | 8 panels                 | 9 panels                 |
|----------------------------------------|--------------------------|--------------------------|--------------------------|--------------------------|--------------------------|--------------------------|--------------------------|--------------------------|--------------------------|
| Figure 1                               | <input type="checkbox"/> | <input type="checkbox"/> | <input type="checkbox"/> | <input type="checkbox"/> | <input type="checkbox"/> | <input type="checkbox"/> | <input type="checkbox"/> | <input type="checkbox"/> | <input type="checkbox"/> |
| Figure 2                               | <input type="checkbox"/> | <input type="checkbox"/> | <input type="checkbox"/> | <input type="checkbox"/> | <input type="checkbox"/> | <input type="checkbox"/> | <input type="checkbox"/> | <input type="checkbox"/> | <input type="checkbox"/> |
| Figure 3                               | <input type="checkbox"/> | <input type="checkbox"/> | <input type="checkbox"/> | <input type="checkbox"/> | <input type="checkbox"/> | <input type="checkbox"/> | <input type="checkbox"/> | <input type="checkbox"/> | <input type="checkbox"/> |
| Figure 4                               | <input type="checkbox"/> | <input type="checkbox"/> | <input type="checkbox"/> | <input type="checkbox"/> | <input type="checkbox"/> | <input type="checkbox"/> | <input type="checkbox"/> | <input type="checkbox"/> | <input type="checkbox"/> |
| Figure 5                               | <input type="checkbox"/> | <input type="checkbox"/> | <input type="checkbox"/> | <input type="checkbox"/> | <input type="checkbox"/> | <input type="checkbox"/> | <input type="checkbox"/> | <input type="checkbox"/> | <input type="checkbox"/> |
| Figure 6                               | <input type="checkbox"/> | <input type="checkbox"/> | <input type="checkbox"/> | <input type="checkbox"/> | <input type="checkbox"/> | <input type="checkbox"/> | <input type="checkbox"/> | <input type="checkbox"/> | <input type="checkbox"/> |
| Figure 7                               | <input type="checkbox"/> | <input type="checkbox"/> | <input type="checkbox"/> | <input type="checkbox"/> | <input type="checkbox"/> | <input type="checkbox"/> | <input type="checkbox"/> | <input type="checkbox"/> | <input type="checkbox"/> |
| Figure 8                               | <input type="checkbox"/> | <input type="checkbox"/> | <input type="checkbox"/> | <input type="checkbox"/> | <input type="checkbox"/> | <input type="checkbox"/> | <input type="checkbox"/> | <input type="checkbox"/> | <input type="checkbox"/> |
| Figure 9                               | <input type="checkbox"/> | <input type="checkbox"/> | <input type="checkbox"/> | <input type="checkbox"/> | <input type="checkbox"/> | <input type="checkbox"/> | <input type="checkbox"/> | <input type="checkbox"/> | <input type="checkbox"/> |
| Figure 10 or more (combine additional) | <input type="checkbox"/> | <input type="checkbox"/> | <input type="checkbox"/> | <input type="checkbox"/> | <input type="checkbox"/> | <input type="checkbox"/> | <input type="checkbox"/> | <input type="checkbox"/> | <input type="checkbox"/> |

10. How many tables in the paper (not supplement)?

Mark only one oval.

|                       |                       |                       |                       |                       |                       |                  |
|-----------------------|-----------------------|-----------------------|-----------------------|-----------------------|-----------------------|------------------|
| 0                     | 1                     | 2                     | 3                     | 4                     | 5                     | Choose 5 for >=5 |
| <input type="radio"/> | <input type="radio"/> | <input type="radio"/> | <input type="radio"/> | <input type="radio"/> | <input type="radio"/> |                  |

11. Does the change between preprint and paper in the main figures (including tables) reflect a change in content or outcomes? \*

*Check all that apply.*

- No, no real changes at all (including reorganisation)
- No, panels or tables have just been moved around (including to supplement if available)
- Yes, significant additional content/outcomes have been added
- Yes, significant content/outcomes have been removed

12. Does the preprint have a supplement? How many files or items (figures, spreadsheets, extended methods)?

*Mark only one oval.*

|                       |                       |                       |                       |                       |                       |                         |
|-----------------------|-----------------------|-----------------------|-----------------------|-----------------------|-----------------------|-------------------------|
| 0                     | 1                     | 2                     | 3                     | 4                     | 5                     |                         |
| <input type="radio"/> | <input type="radio"/> | <input type="radio"/> | <input type="radio"/> | <input type="radio"/> | <input type="radio"/> | Select option 5 for >=5 |

13. If the preprint does have a supplement, does it contain figures?

*Mark only one oval.*

- Yes
- No

14. Does the paper have a supplement? How many files or items (figures, spreadsheets, extended methods)?

*Mark only one oval.*

|                       |                       |                       |                       |                       |                       |                         |
|-----------------------|-----------------------|-----------------------|-----------------------|-----------------------|-----------------------|-------------------------|
| 0                     | 1                     | 2                     | 3                     | 4                     | 5                     |                         |
| <input type="radio"/> | <input type="radio"/> | <input type="radio"/> | <input type="radio"/> | <input type="radio"/> | <input type="radio"/> | Select option 5 for >=5 |

15. If the paper does have a supplement, does it contain figures?

*Mark only one oval.*

Yes

No

16. Is the source data (including code) more accessible after publication?

*Check all that apply.*

No, same as preprint - available only upon request

No, same as the preprint - available through repositories or supplementary files

Yes, provided as additional supplementary files

Yes, provided through repositories

Other:  \_\_\_\_\_

17. Are open peer reviews and decision letters available?

*Mark only one oval.*

Yes, via Review Commons or any other post-publication review scheme

Yes, provided by the journal

No

Don't know/ cannot locate this information

18. Any other comments?

---

---

---

---

---
